# Supplementary material
Source: publisher figshare collection journal article supplement (https://acs.figshare.com/ndownloader/files/14189642)
Supplement: Supplementary file 1 [file 14189642]

## **Supporting Information**

### **Evaluating the Surface Chemistry of Black Phosphorus during Ambient Degradation**

Maart van Druenen<sup>1,2</sup>, Fionán Davitt<sup>1,2</sup>, Timothy Collins<sup>1</sup>, Colm Glynn<sup>1</sup>, Colm O'Dwyer<sup>1</sup>

Justin D. Holmes<sup>1,2</sup> and Gillian Collins<sup>1,2,\*</sup>

*<sup>1</sup>School of Chemistry, ERI & Tyndall National Institute, University College Cork, Cork, T12 YN60, Ireland.*

*<sup>2</sup>AMBER@CRANN, Trinity College Dublin, Dublin 2, Ireland.*

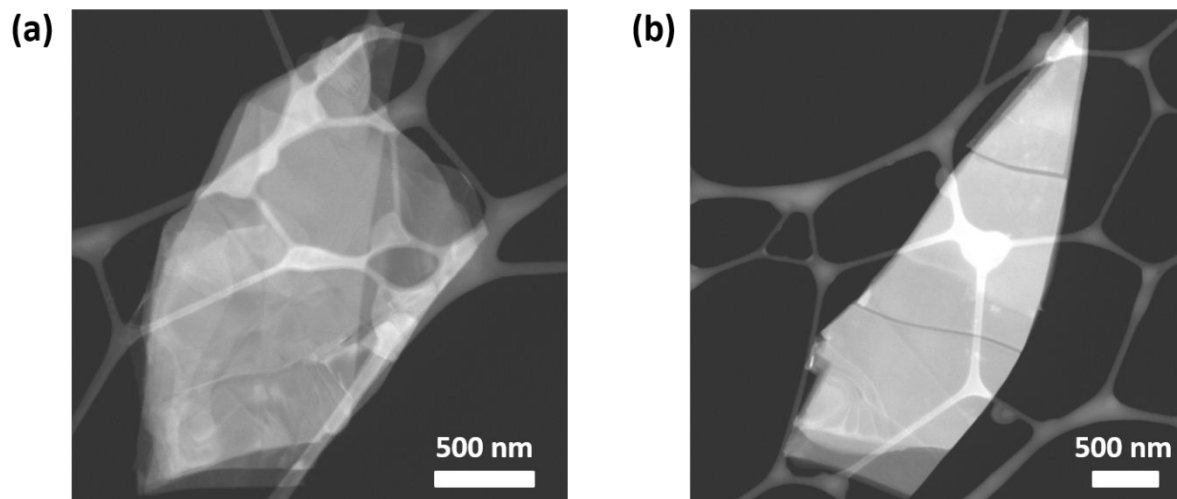

**Figure S1:** STEM analysis of liquid exfoliated few-layer BP.

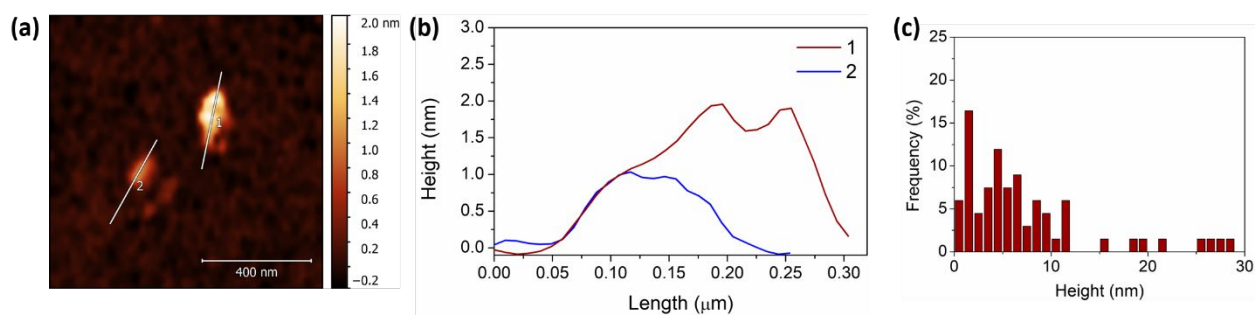

**Figure S2:** AFM analysis of exfoliated BP showing a) mono- and bilayer BP flakes and b) height profiles. c) The histogram gives an indication of the flake thicknesses of a sample used for degradation analysis.

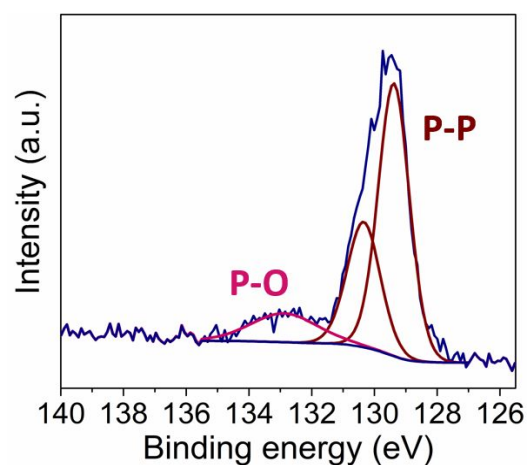

**Figure S3:** XPS P 2p core level displays a reduction in the oxide shoulder to 13 % after purging the solvent with Ar gas before exfoliation, suggesting dissolved gases cause oxidation during the exfoliation stage.

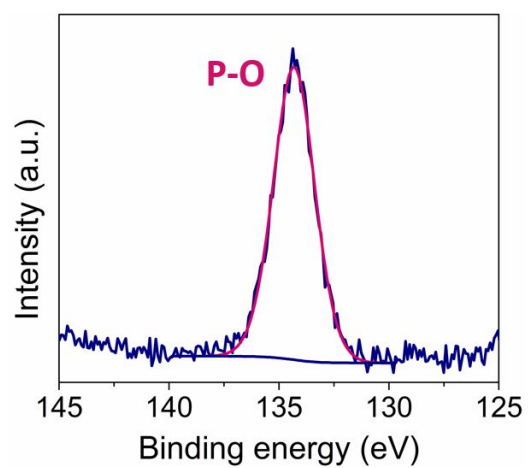

**Figure S4:** XPS analysis of the final product of degradation.

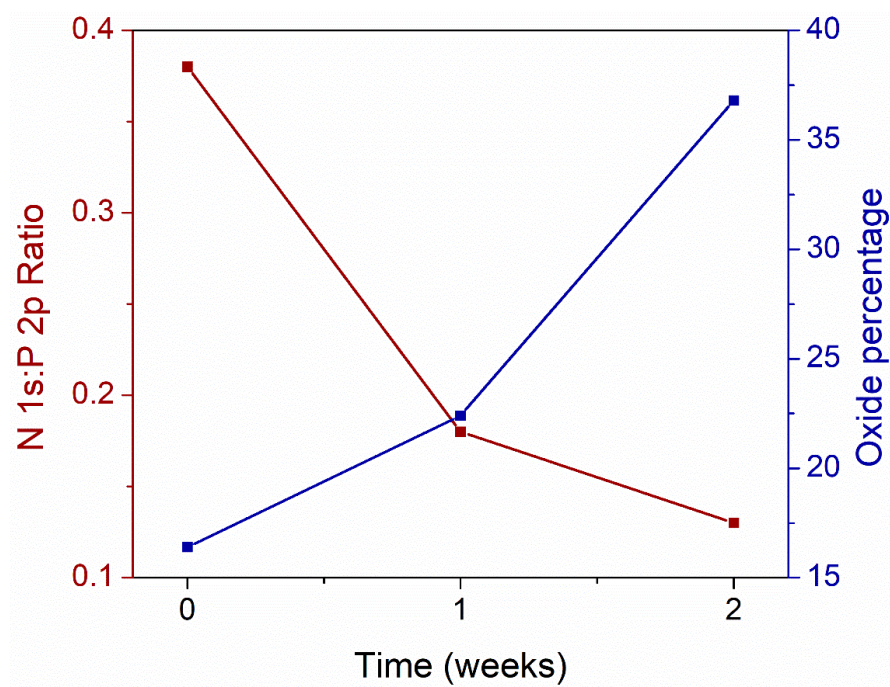

**Figure S5:** N 1s:P 2p ratios and comparison to the percentage of  $\text{PO}_x$  of the P 2p core level during ambient exposure.

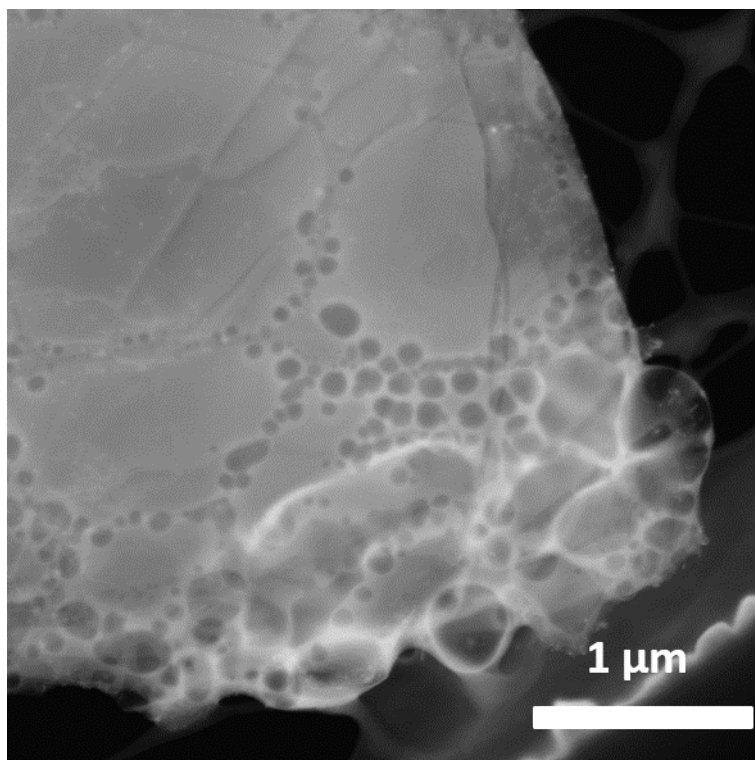

**Figure S6:** High resolution STEM analysis of few-layer BP exposed to ambient conditions for 1 week. Surface protrusions as a result of oxidation are visible.

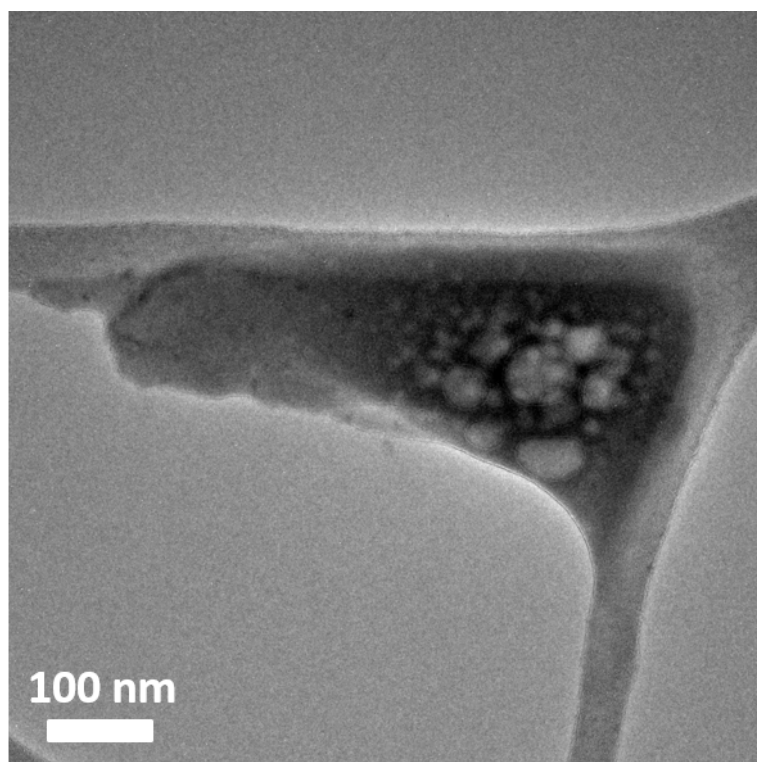

**Figure S7:** TEM analysis of BP exposed to ambient conditions for 1 week.



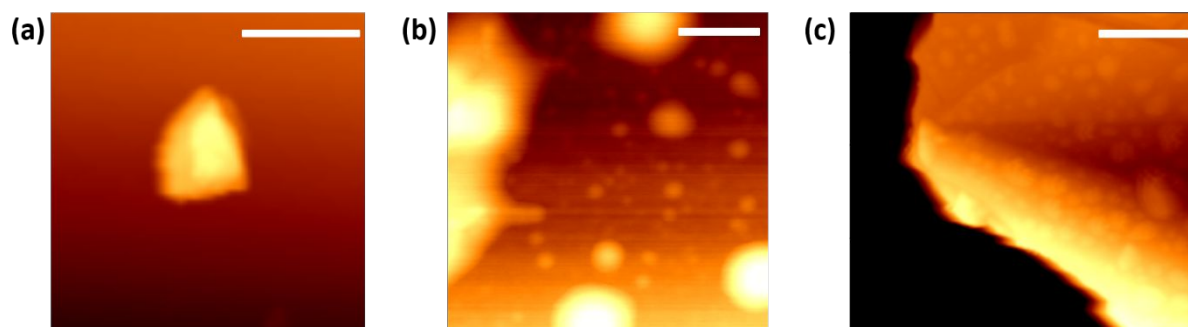

**Figure S8:** AFM analysis of (a) freshly exfoliated few-layer BP, (b) bulk BP exposed to ambient conditions for 1 week and (c) few-layer BP exposed to ambient conditions for a week. The scale bars correspond to 0.5, 0.25 and 1 micron.

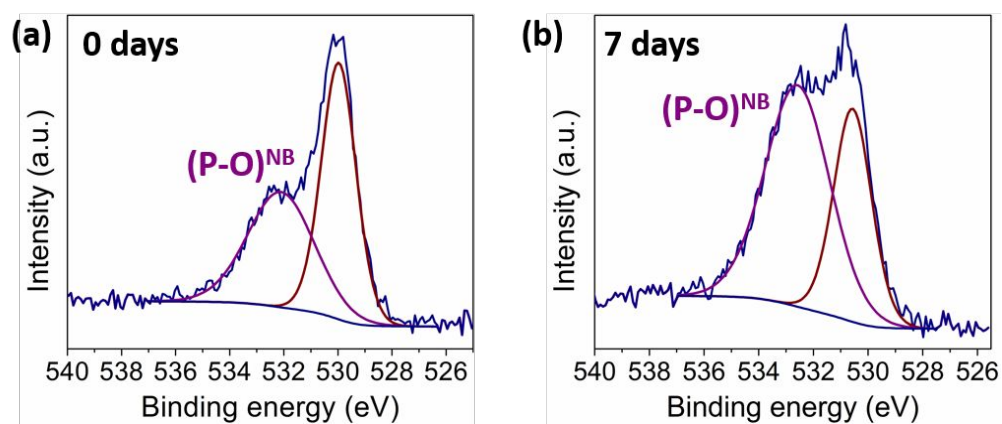

**Figure S9:** XPS O 1s core levels for (a) non-exposed bulk BP and (b) exposed for 1 week to ambient conditions. The increase in the non-bridging P-O component suggests oxidation of the surface but absence of a P-O-P component at 535.5 eV indicates bulk BP does not oxidise as significantly as few-layer BP.
